# Supplementary material for: Early Miocene origin and cryptic diversification of South American salamanders
Source: PubMed Central journal article supplement (PMC3602097; doi:10.1186/1471-2148-13-59), 2013-03-04
Supplement: 1471-2148-13-59-S2.pdf [file 1471-2148-13-59-S2.pdf]

**Additional file 2 – Divergence time estimates based on alternative calibrations.**

Alternative calibrations of 60 (std 6) and 90 (std 6) million years for the crown group Plethodontidae. The calibration date of 75 (std 6) million years was used in the results of Figure 2. SA = South American, Std = standard deviation, HPD = highest posterior density.

| Clade                                     | Norm 60<br>(Std 6) | Norm 60<br>(Std 6) | Norm 60<br>(Std 6) | Norm 75<br>(Std 6) | Norm 75<br>(Std 6) | Norm 75<br>(Std 6) | Norm 90<br>(Std 6) | Norm 90<br>(Std 6) | Norm 90<br>(Std 6) |
|-------------------------------------------|--------------------|--------------------|--------------------|--------------------|--------------------|--------------------|--------------------|--------------------|--------------------|
|                                           | Average            | Min 95%<br>HPD     | Max 95%<br>HPD     | Average            | Min 95%<br>HPD     | Max 95%<br>HPD     | Average            | Min 95%<br>HPD     | Max 95%<br>HPD     |
| <b><i>Bolitoglossa</i></b>                | 40.2               | 29.1               | 50.2               | 50.3               | 36.4               | 62.8               | 60.4               | 43.7               | 75.4               |
| <b><i>Eladinea</i></b>                    | 29.2               | 21.4               | 37.4               | 36.5               | 26.8               | 46.7               | 43.8               | 32.2               | 56.0               |
| <b>SA <i>Bolitoglossa</i></b>             | 18.9               | 12.7               | 24.2               | 23.6               | 15.9               | 30.3               | 28.3               | 19.1               | 36.4               |
| <b><i>B. peruviana (sensu lato)</i></b>   | 8.6                | 5.5                | 12.3               | 10.8               | 6.9                | 15.4               | 13.0               | 8.3                | 18.5               |
| <b><i>B. equatoriana (sensu lato)</i></b> | 5.9                | 0.4                | 12.1               | 7.4                | 0.5                | 15.1               | 8.9                | 0.6                | 18.1               |
