# Supplementary material for: Early Miocene origin and cryptic diversification of South American salamanders
Source: PubMed Central journal article supplement (PMC3602097; doi:10.1186/1471-2148-13-59), 2013-03-04
Supplement: 1471-2148-13-59-S3.pdf [file 1471-2148-13-59-S3.pdf]

30 31 32 33 34 35 36 37 38 39 40 41 42 43 44 45 46 47 48 49 50 51 52 53 54

0.023  
0.000 0.019  
0.105 0.118 0.094  
0.105 0.118 0.094 0.000  
0.105 0.118 0.094 0.000 0.000  
0.105 0.118 0.094 0.000 0.000 0.000  
0.152 0.160 0.173 0.163 0.163 0.163 0.163  
0.152 0.160 0.173 0.163 0.163 0.163 0.163 0.000  
0.152 0.160 0.173 0.163 0.163 0.163 0.163 0.000 0.000  
0.153 0.160 0.173 0.163 0.163 0.163 0.163 0.000 0.000 0.000  
0.152 0.160 0.173 0.163 0.163 0.163 0.163 0.000 0.000 0.000 0.000  
0.152 0.160 0.173 0.163 0.163 0.163 0.163 0.000 0.000 0.000 0.000 0.000  
0.127 0.134 0.158 0.155 0.155 0.155 0.155 0.113 0.113 0.113 0.113 0.113 0.113  
0.123 0.132 0.164 0.147 0.147 0.147 0.147 0.124 0.124 0.124 0.124 0.124 0.124 0.033  
0.126 0.133 0.163 0.156 0.156 0.156 0.156 0.114 0.114 0.114 0.114 0.114 0.114 0.004 0.029  
0.144 0.161 0.143 0.149 0.149 0.149 0.149 0.184 0.184 0.184 0.185 0.184 0.184 0.170 0.168 0.171  
0.117 0.126 0.123 0.118 0.118 0.118 0.118 0.161 0.161 0.161 0.161 0.161 0.161 0.167 0.168 0.168 0.138  
0.146 0.165 0.190 0.170 0.170 0.170 0.170 0.210 0.210 0.210 0.210 0.210 0.210 0.204 0.216 0.204 0.142 0.190  
0.117 0.121 0.127 0.121 0.121 0.121 0.121 0.161 0.161 0.161 0.161 0.161 0.161 0.160 0.141 0.160 0.140 0.082 0.133  
0.095 0.114 0.104 0.107 0.107 0.107 0.107 0.142 0.142 0.142 0.142 0.142 0.142 0.109 0.119 0.108 0.122 0.118 0.137 0.098  
0.152 0.159 0.168 0.163 0.163 0.163 0.163 0.167 0.167 0.167 0.168 0.167 0.167 0.154 0.157 0.151 0.161 0.145 0.180 0.116 0.132  
0.145 0.154 0.170 0.158 0.158 0.158 0.158 0.163 0.163 0.163 0.163 0.163 0.163 0.167 0.183 0.164 0.149 0.147 0.221 0.123 0.147 0.095  
0.137 0.141 0.123 0.130 0.130 0.130 0.130 0.186 0.186 0.186 0.186 0.186 0.186 0.158 0.163 0.157 0.142 0.143 0.179 0.134 0.124 0.147 0.163  
0.165 0.165 0.172 0.158 0.158 0.158 0.158 0.193 0.193 0.193 0.193 0.193 0.193 0.193 0.199 0.191 0.164 0.190 0.115 0.163 0.157 0.172 0.214 0.157  
0.175 0.187 0.170 0.159 0.159 0.159 0.159 0.185 0.185 0.185 0.186 0.185 0.185 0.209 0.241 0.213 0.163 0.159 0.183 0.159 0.144 0.187 0.170 0.181 0.166
