# Supplementary material for: Early Miocene origin and cryptic diversification of South American salamanders
Source: PubMed Central journal article supplement (PMC3602097; doi:10.1186/1471-2148-13-59), 2013-03-04
Supplement: 1471-2148-13-59-S4.pdf [file 1471-2148-13-59-S4.pdf]

**Additional file 4 – Inter-individual uncorrected sequence divergence at *Rag1*. *Sensu lato* interspecific comparisons are shaded grey.**

|                           |    | 1                                     | 2     | 3     | 4     | 5     | 6     | 7     | 8     | 9     | 10    | 11    | 12    | 13    | 14    | 15    | 16    | 17    | 18    |       |
|---------------------------|----|---------------------------------------|-------|-------|-------|-------|-------|-------|-------|-------|-------|-------|-------|-------|-------|-------|-------|-------|-------|-------|
|                           | 1  | QCAZ25522 Kapawi cf peruviana         |       |       |       |       |       |       |       |       |       |       |       |       |       |       |       |       |       |       |
| "altamazonica"            | 2  | QCAZ32291 Yasuni sp                   | 0.022 |       |       |       |       |       |       |       |       |       |       |       |       |       |       |       |       |       |
|                           | 3  | QCAZ20845 PUCE equatoriana            | 0.010 | 0.016 |       |       |       |       |       |       |       |       |       |       |       |       |       |       |       |       |
| upper Napo peruviana      | 4  | QCAZ25320 Cando cf peruviana          | 0.010 | 0.017 | 0.006 |       |       |       |       |       |       |       |       |       |       |       |       |       |       |       |
|                           | 5  | QCAZ25753 EBJSIV cf peruviana         | 0.014 | 0.015 | 0.005 | 0.006 |       |       |       |       |       |       |       |       |       |       |       |       |       |       |
|                           | 6  | QCAZ25387 LaSelva cf peruviana        | 0.009 | 0.022 | 0.010 | 0.009 | 0.014 |       |       |       |       |       |       |       |       |       |       |       |       |       |
| lower Napo/lower          | 7  | QCAZ25385 LaSelva cf peruviana        | 0.014 | 0.025 | 0.011 | 0.010 | 0.015 | 0.002 |       |       |       |       |       |       |       |       |       |       |       |       |
| Aguarico peruviana        | 8  | QCAZ28404 cf peruviana                | 0.020 | 0.029 | 0.010 | 0.013 | 0.016 | 0.015 | 0.016 |       |       |       |       |       |       |       |       |       |       |       |
|                           | 9  | QCAZ25592 Auca cf peruviana           | 0.014 | 0.020 | 0.003 | 0.009 | 0.010 | 0.014 | 0.015 | 0.015 |       |       |       |       |       |       |       |       |       |       |
|                           | 10 | QCAZ25268 Auca cf peruviana           | 0.011 | 0.018 | 0.001 | 0.008 | 0.008 | 0.013 | 0.014 | 0.013 | 0.000 |       |       |       |       |       |       |       |       |       |
|                           | 11 | QCAZ25593 Auca cf peruviana           | 0.017 | 0.026 | 0.009 | 0.014 | 0.016 | 0.019 | 0.021 | 0.023 | 0.011 | 0.001 |       |       |       |       |       |       |       |       |
| Agua Rico peruviana       | 12 | QCAZ25794 AguaRico cf peruviana       | 0.027 | 0.036 | 0.018 | 0.026 | 0.028 | 0.029 | 0.029 | 0.034 | 0.018 | 0.015 | 0.025 |       |       |       |       |       |       |       |
| upper equatoriana         | 13 | QCAZ25448 EBJs equatoriana            | 0.024 | 0.034 | 0.014 | 0.022 | 0.021 | 0.025 | 0.027 | 0.028 | 0.018 | 0.015 | 0.024 | 0.032 |       |       |       |       |       |       |
| equatoriana sensu stricto | 14 | QCAZ37304 BU0230 Tiputini equatoriana | 0.018 | 0.025 | 0.005 | 0.014 | 0.013 | 0.018 | 0.019 | 0.019 | 0.010 | 0.006 | 0.015 | 0.025 | 0.008 |       |       |       |       |       |
|                           | 15 | QCAZPaul ECSanFran sp                 | 0.016 | 0.024 | 0.004 | 0.011 | 0.011 | 0.015 | 0.016 | 0.016 | 0.009 | 0.005 | 0.013 | 0.025 | 0.016 | 0.007 |       |       |       |       |
|                           | 16 | QCAZ39981 Chilma sp                   | 0.029 | 0.034 | 0.014 | 0.024 | 0.024 | 0.028 | 0.028 | 0.027 | 0.019 | 0.017 | 0.026 | 0.035 | 0.026 | 0.020 | 0.016 |       |       |       |
|                           | 17 | QCAZ41724 Condor sp                   | 0.015 | 0.021 | 0.003 | 0.011 | 0.009 | 0.015 | 0.016 | 0.015 | 0.008 | 0.004 | 0.011 | 0.023 | 0.014 | 0.005 | 0.000 | 0.018 |       |       |
|                           | 18 | biseriata                             | 0.036 | 0.041 | 0.021 | 0.031 | 0.031 | 0.034 | 0.037 | 0.034 | 0.029 | 0.025 | 0.031 | 0.044 | 0.037 | 0.029 | 0.024 | 0.026 | 0.025 |       |
|                           | 19 | MVZ233516 cerroensis                  | 0.037 | 0.047 | 0.025 | 0.036 | 0.035 | 0.039 | 0.041 | 0.041 | 0.031 | 0.025 | 0.032 | 0.045 | 0.034 | 0.030 | 0.029 | 0.029 | 0.026 | 0.032 |
