# Supplementary material for: Early Miocene origin and cryptic diversification of South American salamanders
Source: PubMed Central journal article supplement (PMC3602097; doi:10.1186/1471-2148-13-59), 2013-03-04
Supplement: 1471-2148-13-59-S6.pdf [file 1471-2148-13-59-S6.pdf]

**Additional file 6 – List of specimens (species, GenBank accession, continent) included in the divergence time species tree analysis (x = included) and/or the pruned ancestral area reconstruction, which included fewer representatives per clade.**

| <b>Genus</b>         | <b>species (and clade)</b>                             | <b>Cytb</b> | <b>Rag1</b> | <b>Continent</b> | <b>Species tree</b> | <b>Ancestral area</b> |
|----------------------|--------------------------------------------------------|-------------|-------------|------------------|---------------------|-----------------------|
| <i>Aneides</i>       | <i>aeneus</i>                                          | AY691742    | AY691701    | North America    | x                   | x                     |
| <i>Desmognathus</i>  | <i>brimleyorum</i>                                     | AY691737    | AY691697    | North America    | x                   | x                     |
| <i>Ensatina</i>      | <i>eschschoztzii</i>                                   | AY691743    | AY691702    | North America    | x                   | x                     |
| <i>Plethodon</i>     | <i>cinereus</i>                                        | AY691745    | AY691703    | North America    | x                   | x                     |
| <i>Pseudoeurycea</i> | <i>rex</i>                                             | AY691757    | AY650125    | Central America  | x                   | x                     |
| <i>Thorius</i>       | <i>troglydytes</i>                                     | KC614433    | KC614460    | Central America  | x                   | x                     |
| <i>Bolitoglossa</i>  | <i>adspersa</i>                                        | AF212984    |             | South America    | x                   | x                     |
| <i>Bolitoglossa</i>  | <i>alberchi</i>                                        | AF212978    |             | Central America  | x                   |                       |
| <i>Bolitoglossa</i>  | <i>alberchi</i>                                        | AF212979    |             | Central America  | x                   | x                     |
| <i>Bolitoglossa</i>  | <i>altamazonica</i>                                    | AY526160    |             | South America    | x                   |                       |
| <i>Bolitoglossa</i>  | <i>biseriata</i>                                       | AY526161    | KC614436    | Central America  | x                   | x                     |
| <i>Bolitoglossa</i>  | <i>carri</i>                                           |             | KC614458    | Central America  | x                   | x                     |
| <i>Bolitoglossa</i>  | <i>carri</i>                                           | AY526175    |             | Central America  | x                   |                       |
| <i>Bolitoglossa</i>  | <i>carri</i>                                           | AY526176    |             | Central America  | x                   |                       |
| <i>Bolitoglossa</i>  | <i>celaque</i>                                         | AY526177    |             | Central America  | x                   | x                     |
| <i>Bolitoglossa</i>  | <i>celaque</i>                                         | AY526178    |             | Central America  | x                   |                       |
| <i>Bolitoglossa</i>  | <i>cf. equatoriana</i> (upper equatoriana clade)       | DQ353842    | KC614451    | South America    | x                   | x                     |
| <i>Bolitoglossa</i>  | <i>cf. equatoriana</i> (upper equatoriana clade)       | DQ353840    |             | South America    | x                   |                       |
| <i>Bolitoglossa</i>  | <i>cf. equatoriana</i> (upper equatoriana clade)       | DQ353841    |             | South America    | x                   |                       |
| <i>Bolitoglossa</i>  | <i>cf. equatoriana</i> (upper equatoriana clade)       | DQ353843    |             | South America    | x                   |                       |
| <i>Bolitoglossa</i>  | <i>cf. equatoriana</i> (upper equatoriana clade)       | DQ353844    |             | South America    | x                   |                       |
| <i>Bolitoglossa</i>  | <i>cf. equatoriana</i> (upper equatoriana clade)       | DQ353846    |             | South America    | x                   |                       |
| <i>Bolitoglossa</i>  | <i>cf. peruviana</i> (altamazonica clade)              | DQ353809    | KC614442    | South America    | x                   | x                     |
| <i>Bolitoglossa</i>  | <i>cf. peruviana</i> (altamazonica clade)              | KC614427    | KC614453    | South America    | x                   | x                     |
| <i>Bolitoglossa</i>  | <i>cf. peruviana</i> (altamazonica clade)              | KC614430    | KC614455    | South America    | x                   | x                     |
| <i>Bolitoglossa</i>  | <i>cf. peruviana</i> (altamazonica clade)              | DQ353810    |             | South America    | x                   |                       |
| <i>Bolitoglossa</i>  | <i>cf. peruviana</i> (altamazonica clade)              | DQ353811    |             | South America    | x                   |                       |
| <i>Bolitoglossa</i>  | <i>cf. peruviana</i> (lower Napo/lower Aguarico clade) | DQ353836    | KC614450    | South America    | x                   | x                     |
| <i>Bolitoglossa</i>  | <i>cf. peruviana</i> (lower Napo/lower Aguarico clade) | DQ353830    |             | South America    | x                   |                       |
| <i>Bolitoglossa</i>  | <i>cf. peruviana</i> (lower Napo/lower Aguarico clade) | DQ353831    |             | South America    | x                   |                       |

|                     |                                                        |          |          |                 |   |   |
|---------------------|--------------------------------------------------------|----------|----------|-----------------|---|---|
| <i>Bolitoglossa</i> | cf. <i>peruviana</i> (lower Napo/lower Aguarico clade) | DQ353832 |          | South America   | x |   |
| <i>Bolitoglossa</i> | cf. <i>peruviana</i> (lower Napo/lower Aguarico clade) | DQ353833 |          | South America   | x |   |
| <i>Bolitoglossa</i> | cf. <i>peruviana</i> (lower Napo/lower Aguarico clade) | DQ353834 |          | South America   | x |   |
| <i>Bolitoglossa</i> | cf. <i>peruviana</i> (lower Napo/lower Aguarico clade) | DQ353835 |          | South America   | x |   |
| <i>Bolitoglossa</i> | cf. <i>peruviana</i> (lower Napo/lower Aguarico clade) | DQ353837 |          | South America   | x |   |
| <i>Bolitoglossa</i> | cf. <i>peruviana</i> (lower Napo/lower Aguarico clade) | DQ353839 |          | South America   | x |   |
| <i>Bolitoglossa</i> | cf. <i>peruviana</i> (lower Napo/lower Aguarico clade) | KC614454 |          | South America   | x |   |
| <i>Bolitoglossa</i> | cf. <i>peruviana</i> (lower Napo/lower Aguarico clade) | KC614444 |          | South America   |   | x |
| <i>Bolitoglossa</i> | cf. <i>peruviana</i> (upper Aguarico clade)            | DQ353815 | KC614443 | South America   | x | x |
| <i>Bolitoglossa</i> | cf. <i>peruviana</i> (upper Aguarico clade)            | DQ353812 |          | South America   | x |   |
| <i>Bolitoglossa</i> | cf. <i>peruviana</i> (upper Aguarico clade)            | DQ353813 |          | South America   | x |   |
| <i>Bolitoglossa</i> | cf. <i>peruviana</i> (upper Aguarico clade)            | DQ353814 |          | South America   | x |   |
| <i>Bolitoglossa</i> | cf. <i>peruviana</i> (upper Napo clade)                | DQ353821 | KC614445 | South America   | x | x |
| <i>Bolitoglossa</i> | cf. <i>peruviana</i> (upper Napo clade)                | DQ353827 | KC614446 | South America   | x | x |
| <i>Bolitoglossa</i> | cf. <i>peruviana</i> (upper Napo clade)                | DQ353816 |          | South America   | x |   |
| <i>Bolitoglossa</i> | cf. <i>peruviana</i> (upper Napo clade)                | DQ353817 |          | South America   | x |   |
| <i>Bolitoglossa</i> | cf. <i>peruviana</i> (upper Napo clade)                | DQ353818 |          | South America   | x |   |
| <i>Bolitoglossa</i> | cf. <i>peruviana</i> (upper Napo clade)                | DQ353820 |          | South America   | x |   |
| <i>Bolitoglossa</i> | cf. <i>peruviana</i> (upper Napo clade)                | DQ353822 |          | South America   | x |   |
| <i>Bolitoglossa</i> | cf. <i>peruviana</i> (upper Napo clade)                | DQ353823 |          | South America   | x |   |
| <i>Bolitoglossa</i> | cf. <i>peruviana</i> (upper Napo clade)                | DQ353824 |          | South America   | x |   |
| <i>Bolitoglossa</i> | cf. <i>peruviana</i> (upper Napo clade)                | DQ353825 |          | South America   | x |   |
| <i>Bolitoglossa</i> | cf. <i>peruviana</i> (upper Napo clade)                | DQ353826 |          | South America   | x |   |
| <i>Bolitoglossa</i> | cf. <i>peruviana</i> (upper Napo clade)                | DQ353828 |          | South America   | x |   |
| <i>Bolitoglossa</i> | cf. <i>peruviana</i> (upper Napo clade)                | DQ353829 |          | South America   | x |   |
| <i>Bolitoglossa</i> | <i>colonnea</i>                                        | AY526162 |          | Central America | x | x |
| <i>Bolitoglossa</i> | <i>conanti</i>                                         | AY526179 |          | Central America | x | x |
| <i>Bolitoglossa</i> | <i>conanti</i>                                         |          | KC699924 | Central America | x | x |
| <i>Bolitoglossa</i> | <i>decora</i>                                          | AY526180 |          | Central America | x | x |
| <i>Bolitoglossa</i> | <i>diaphora</i>                                        | AY526181 |          | Central America | x | x |
| <i>Bolitoglossa</i> | <i>dofleini</i>                                        | AF212988 |          | Central America | x | x |
| <i>Bolitoglossa</i> | <i>dunni</i>                                           | AY526182 | KC614438 | Central America | x | x |
| <i>Bolitoglossa</i> | <i>engelhardti</i>                                     | AF212987 |          | Central America | x | x |
| <i>Bolitoglossa</i> | <i>engelhardti</i>                                     |          | KC699925 | Central America | x | x |
| <i>Bolitoglossa</i> | <i>epimela</i>                                         | AF212097 |          | Central America | x | x |
| <i>Bolitoglossa</i> | <i>equatoriana</i>                                     | DQ353845 |          | South America   | x |   |
| <i>Bolitoglossa</i> | <i>equatoriana</i>                                     | KC614428 |          | South America   | x | x |

|                     |                                                                    |          |          |                 |   |   |
|---------------------|--------------------------------------------------------------------|----------|----------|-----------------|---|---|
| <i>Bolitoglossa</i> | <i>equatoriana</i> (was <i>peruviana</i> in Parra-Olea et al 2004) | AY526169 |          | South America   | x |   |
| <i>Bolitoglossa</i> | <i>flaviventris</i>                                                | AF212983 |          | Central America | x | x |
| <i>Bolitoglossa</i> | <i>franklini</i>                                                   | AY526184 | KC614439 | Central America | x | x |
| <i>Bolitoglossa</i> | <i>gracilis</i>                                                    | AF212067 |          | Central America | x | x |
| <i>Bolitoglossa</i> | <i>gracilis</i>                                                    | AF212068 |          | Central America | x |   |
| <i>Bolitoglossa</i> | <i>helmrichi</i>                                                   | AY691755 | AY650124 | Central America | x | x |
| <i>Bolitoglossa</i> | <i>hermosa</i>                                                     | AF416678 |          | Central America | x | x |
| <i>Bolitoglossa</i> | <i>lincolni</i>                                                    | AY526185 | KC614440 | Central America | x | x |
| <i>Bolitoglossa</i> | <i>longissima</i>                                                  | AY526186 | KC614441 | Central America | x | x |
| <i>Bolitoglossa</i> | <i>macrinii</i>                                                    | AF416680 |          | Central America | x | x |
| <i>Bolitoglossa</i> | <i>medemi</i>                                                      | AY526163 | KC614437 | Central America | x | x |
| <i>Bolitoglossa</i> | <i>mexicana</i>                                                    | AF212099 |          | Central America | x |   |
| <i>Bolitoglossa</i> | <i>mexicana</i>                                                    | AF212975 |          | Central America | x |   |
| <i>Bolitoglossa</i> | <i>mexicana</i>                                                    | AF212976 |          | Central America | x |   |
| <i>Bolitoglossa</i> | <i>minutula</i>                                                    | AF212098 | KC614434 | Central America | x | x |
| <i>Bolitoglossa</i> | <i>mombachoensis</i>                                               | AY133486 |          | Central America | x | x |
| <i>Bolitoglossa</i> | <i>morio</i>                                                       |          | KC699926 | Central America | x | x |
| <i>Bolitoglossa</i> | <i>morio</i>                                                       | AF212986 |          | Central America | x |   |
| <i>Bolitoglossa</i> | <i>morio</i>                                                       | AY526187 |          | Central America | x |   |
| <i>Bolitoglossa</i> | <i>oaxacensis</i>                                                  | AF416681 |          | Central America | x | x |
| <i>Bolitoglossa</i> | <i>occidentalis</i>                                                | AY526158 | KC614435 | Central America | x | x |
| <i>Bolitoglossa</i> | <i>odonnelli</i>                                                   | AF212977 | KC699922 | Central America | x | x |
| <i>Bolitoglossa</i> | <i>palmata</i>                                                     | AY526164 |          | South America   | x | x |
| <i>Bolitoglossa</i> | <i>palmata</i>                                                     | AY526165 |          | South America   | x |   |
| <i>Bolitoglossa</i> | <i>paraensis</i>                                                   | AY526166 |          | South America   | x | x |
| <i>Bolitoglossa</i> | <i>paraensis</i>                                                   | AY526167 |          | South America   | x |   |
| <i>Bolitoglossa</i> | <i>paraensis</i>                                                   | AY526168 |          | South America   | x |   |
| <i>Bolitoglossa</i> | <i>peruviana</i>                                                   | AY526170 |          | South America   | x |   |
| <i>Bolitoglossa</i> | <i>pesubra</i>                                                     | AF212069 |          | Central America | x | x |
| <i>Bolitoglossa</i> | <i>platydactyla</i>                                                | AF212981 | KC699923 | Central America | x | x |
| <i>Bolitoglossa</i> | <i>platydactyla</i>                                                | AY133484 |          | Central America | x |   |
| <i>Bolitoglossa</i> | <i>porrasorum</i>                                                  | AY526188 |          | Central America | x | x |
| <i>Bolitoglossa</i> | <i>riletti</i>                                                     | AF416682 |          | Central America | x | x |
| <i>Bolitoglossa</i> | <i>rufescens</i>                                                   | AY526159 |          | Central America | x | x |
| <i>Bolitoglossa</i> | <i>schizodactyla</i>                                               | AY526171 |          | Central America | x | x |
| <i>Bolitoglossa</i> | <i>sp.</i> (Chilma)                                                | KC614431 | KC614456 | South America   | x | x |
| <i>Bolitoglossa</i> | <i>sp.</i> (Condor)                                                | KC614432 |          | South America   | x | x |

|                     |                        |          |                 |   |   |
|---------------------|------------------------|----------|-----------------|---|---|
| <i>Bolitoglossa</i> | <i>sp. (ECSanFran)</i> | KC699921 | South America   | x | x |
| <i>Bolitoglossa</i> | <i>sp.B</i>            | AF212088 | Central America | x | x |
| <i>Bolitoglossa</i> | <i>sp.MGP-1</i>        | AY526173 | South America   | x | x |
| <i>Bolitoglossa</i> | <i>sp.MGP-2</i>        | AY526174 | Central America | x | x |
| <i>Bolitoglossa</i> | <i>sp.MGP-3</i>        | AY526191 | Central America | x | x |
| <i>Bolitoglossa</i> | <i>sp.MGP-3</i>        | AY526192 | Central America | x | x |
| <i>Bolitoglossa</i> | <i>subpalmata</i>      | AF212094 | Central America | x | x |
| <i>Bolitoglossa</i> | <i>synoria</i>         | AY526193 | Central America | x | x |
| <i>Bolitoglossa</i> | <i>yucatana</i>        | AF212980 | Central America | x | x |
| <i>Bolitoglossa</i> | <i>zapoteca</i>        | AF416683 | Central America | x | x |
| <i>Bolitoglossa</i> | <i>zapoteca</i>        | AF416684 | Central America | x |   |

---
