# Supplementary material for: Early Miocene origin and cryptic diversification of South American salamanders
Source: PubMed Central journal article supplement (PMC3602097; doi:10.1186/1471-2148-13-59), 2013-03-04
Supplement: 1471-2148-13-59-S7.pdf [file 1471-2148-13-59-S7.pdf]

**Additional file 7 - Best likelihood models of sequence evolution for each codon position and combined positions.**

Models were selected by AIC score and were used to inform the likelihood parameters of the MrBayes phylogenetic analysis. For the Bayesian phylogenetic analyses, the best model for *Cytb* was with position 1, 2 and 3 separate. The best model for *Rag1* was also with position 1, 2 and 3 separate.

|       | position 1 | position 2 | position 1+2<br>combined | position 3 | position 1+2+3<br>combined |
|-------|------------|------------|--------------------------|------------|----------------------------|
| cyt b | HKY+I      | TVM+I      | TrN+I+G                  | SYM+G      | HKY+I+G                    |
| rag1  | TVM        | F81+I      | TVM+I                    | TVM+G      | TVMef+I+G                  |
